# Supplementary material for: Machine Learning Methods as a Cost-Effective Alternative to Physics-Based Binding Free Energy Calculations
Source: MDPI journal article supplement (doi:10.3390/molecules29040830), 2024-02-13
Supplement: s1 [file s1]

## Supporting Information

# Machine Learning Methods as a Cost-Effective Alternative to Physics-Based Binding Free Energy Calculations

Nupur Bansal \*, Ye Wang and Simone Sciabola

Biotherapeutic and Medicinal Sciences, Biogen, 225 Binney Street, Cambridge, MA 02142, USA

\* Correspondence: nupur.bansal@biogen.com; Tel.: +1-(617)-914-0719

|                 |        |                                                                                     |                                                                                     |
|-----------------|--------|-------------------------------------------------------------------------------------|-------------------------------------------------------------------------------------|
| Conditions T:   | 300    | P:                                                                                  | 101                                                                                 |
| Salt:           | NaCl ▼ | C:                                                                                  | 0.1 ▼                                                                               |
| Time / Ligand:  | 150 ▼  |   |   |
| Equilibrate q0: | 3 ▼    | q:                                                                                  | 0.4 ▼                                                                               |
| Minimum pM:     | 5 ▼    | p:                                                                                  | 0.01 ▼                                                                              |
| Maximum K:      | 30 ▼   |                                                                                     |                                                                                     |
| GPU Count:      | 20 ▼ ? |  |  |
| Cost / hour:    | 0.8 ▼  |                                                                                     | \$4,269                                                                             |
| ns / hour:      | 13 ▼   |                                                                                     | 11.1 days                                                                           |

**Figure S1.** Amber-TI conditions used for all the Targets in MOE interface.

**Table S1.** Lists the mean Pearson's R value obtained for each Target for all the methods that were used in this study.

|                           | Target 1<br>(N=29) | Target 2-<br>Dataset 1<br>(N=51) | Target 2-<br>Dataset 2<br>(N=38) | Target 3<br>(N=20) | Target 4<br>(N=34) |
|---------------------------|--------------------|----------------------------------|----------------------------------|--------------------|--------------------|
| Mol wt.                   | 0.26               | -0.34                            | 0.15                             | -0.29              | -0.36              |
| cLogD                     | 0.57               | -0.12                            | -0.27                            | -0.25              | 0.30               |
| Glide SP                  | 0.00               | 0.65                             | 0.38                             | 0.41               | -0.04              |
| MOE MMGBSA                | 0.01               | 0.58                             | 0.24                             | 0.22               | 0.52               |
| MMGBSA-0                  | -0.22              | 0.78                             | 0.50                             | 0.67               | 0.51               |
| MMGBSA-3                  | -0.20              | 0.57                             | 0.33                             | 0.48               | 0.50               |
| MMGBSA-6                  | -0.08              | 0.62                             | 0.50                             | 0.37               | 0.49               |
| Amber TI                  | 0.28               | 0.21                             | -0.03                            | -0.12              | 0.12               |
| FEP+                      | 0.43               | 0.90                             | 0.52                             | 0.62               | 0.62               |
| DeltaDeltaG               | 0.48               | 0.86                             | 0.87                             | 0.53               | 0.51               |
| KDEEP (Biogen<br>Trained) | 0.43               | 0.86                             | 0.86                             | 0.28               | 0.30               |
| KDEEP (Default)           | 0.16               | -0.31                            | -0.24                            | 0.30               | -0.15              |

**Table S2.** Lists the R<sup>2</sup> and pairwise RMSE from FEP+ observed for each Target.

|                     | N  | FEP+<br>R <sup>2</sup> | FEP+ RMSE<br>(pairwise) |
|---------------------|----|------------------------|-------------------------|
| Target 1            | 29 | 0.72                   | 1.47                    |
| Target 2-Dataset1   | 51 | 0.87                   | 1.16                    |
| Target 2- Dataset 2 | 38 | 38                     | 2.46                    |
| Target 3            | 20 | 20                     | 1.80                    |
| Target 4            | 34 | 34                     | 1.66                    |

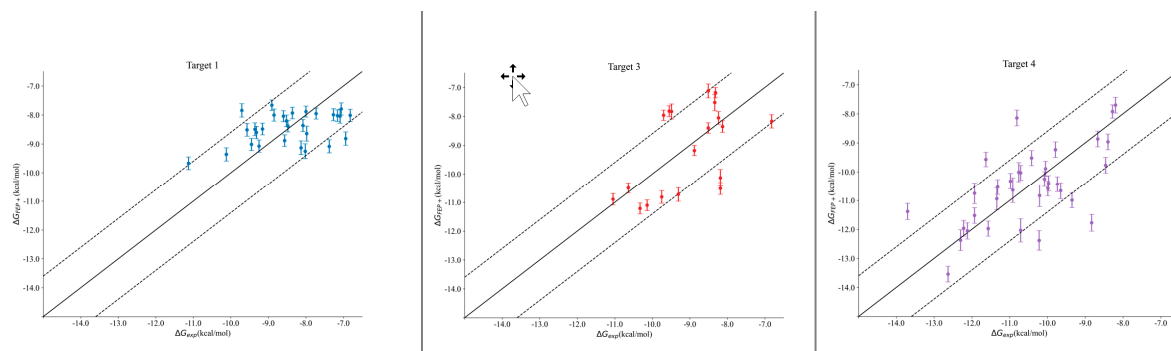

**Figure S2.** Correlation plots obtained from FEP+ for Targets 1, 3 and 4.

**Table S3.** Details of each run for DeltaDeltaG for each target

| Dataset           | Train | Test | R<br>(run1) | R<br>(run2) | R<br>(run3) | R<br>(run4) | R<br>(run5) | R<br>(average) | R<br>(stdev) |
|-------------------|-------|------|-------------|-------------|-------------|-------------|-------------|----------------|--------------|
| Target 1          | 52    | 29   | 0.53        | 0.59        | 0.40        | 0.51        | 0.51        | 0.51           | 0.07         |
| Target 2-Dataset1 | 72    | 51   | 0.86        | 0.86        | 0.85        | 0.86        | 0.87        | 0.86           | 0.01         |
| Target 2-Dataset2 | 158   | 38   | 0.85        | 0.86        | 0.88        | 0.87        | 0.87        | 0.87           | 0.01         |
| Target 3          | 57    | 20   | 0.35        | 0.61        | 0.55        | 0.55        | 0.59        | 0.53           | 0.11         |
| Target 4          | 195   | 34   | 0.48        | 0.54        | 0.45        | 0.44        | 0.48        | 0.48           | 0.04         |
